# Supplementary material
Source: HighWire-hosted journal article supplement (https://erj.ersjournals.com/content/51/1/1702052)
Supplement: inline-supplementary-material-1 [file inline-supplementary-material-1.pdf]

## RESPIRE 1 Supplementary material

| Identifier        | Description                                                                        | Page |
|-------------------|------------------------------------------------------------------------------------|------|
| <b>Sections</b>   |                                                                                    |      |
| <b>Section S1</b> | Pre-defined subgroups for efficacy analyses                                        | 2    |
| <b>Section S2</b> | Safety end-points                                                                  | 2    |
| <b>Section S3</b> | Study investigators                                                                | 3    |
| <b>Tables</b>     |                                                                                    |      |
| <b>Table S1</b>   | Randomisation by country                                                           | 6    |
| <b>Table S2</b>   | Pre-specified pathogens isolated at baseline                                       | 7    |
| <b>Table S3</b>   | Concomitant respiratory medications at baseline                                    | 8    |
| <b>Table S4</b>   | Serious treatment-emergent adverse events and deaths                               | 9    |
| <b>Figures</b>    |                                                                                    |      |
| <b>Figure S1</b>  | Ciprofloxacin DPI pocket-sized inhaler                                             | 11   |
| <b>Figure S2</b>  | End-points according to hierarchical analysis plan.                                | 12   |
| <b>Figure S3</b>  | Efficacy of Ciprofloxacin DPI in reducing exacerbations in pre-specified subgroups | 13   |

## Section S1 Pre-defined subgroups for efficacy analyses

- The following subgroups were pre-defined for analysis:
  - Patients with and those without positive baseline culture of *Pseudomonas aeruginosa*
  - Patients with an FEV1 <50% and those with an FEV1 ≥50% of predicted at baseline
  - Patients with and those without a hospitalisation due to reported exacerbation in the previous year or more than two reported exacerbations requiring systemic antibiotic treatment in the previous year
  - Patients with and those without positive repeat culture (at least one organism in common) before start of study treatment (i.e. based on the central lab result at screening and randomisation visit)
  - Patients with and those without chronic macrolide use
  - Patients with and those without a ciprofloxacin-resistant pathogen based on systemic breakpoints at baseline (see online supplementary section S2).

## Section S2 Safety end-points

- All adverse events were classified using Medical Dictionary for Regulatory Activities (MedDRA Version 18.1). The results were summarised, at a minimum, on the level of system organ class and preferred term. Data were also summarised according to intensity and investigator's causality assessment.
- Minimal inhibitory concentrations (MICs) of sputum isolates were tested against ciprofloxacin. Elevated (resistant) MICs were classified as follows based on Clinical and Laboratory Standards Institute breakpoints:<sup>1</sup>
  - *Haemophilus influenzae*: ≥2 µg/mL
  - *Moraxella catarrhalis*: ≥2 µg/mL
  - *Pseudomonas aeruginosa*: ≥4 µg/mL
  - *Staphylococcus aureus*: ≥4 µg/mL
  - *Streptococcus pneumoniae*: ≥4 µg/mL
  - *Burkholderia cepacia*: ≥4 µg/mL
  - *Stenotrophomonas maltophilia*: ≥4 µg/mL

---

<sup>1</sup>Clinical and Laboratory Standards Institute (CLSI). Performance Standards for Antimicrobial Susceptibility Testing. 2016

### **Section S3** Study investigators who screened at least one subject

- Argentina: Rizzo Oscar, Centro de Investigación Clínica CEDIC, Capital Federal; Grilli Monica, Hospital Español de Mendoza, Godoy Cruz.
- Australia: Huw Davies, Repatriation General Hospital, Daws Park; David Langton, Peninsula Health Frankston Hospital, Frankston; Chien-Li Holmes-Liew, Royal Adelaide Hospital, Adelaide; Mon Ming (Michael) Chia, Respiratory Clinical Trials Pty Ltd, Glen Osmond; Frank Thien, Box Hill Hospital, Box Hill; John Armstrong, Princess Alexandra Hospital, Woollongabba; Antony Veale, The Queen Elizabeth Hospital, Woodville South; Frederick Graham Simpson, Cairns Base Hospital, Cairns; Gary Hammerschlag, Royal Melbourne Hospital, Parkville; Robert Stirling, The Alfred Hospital, Melbourne; Steven Lindstrom, St George Hospital, Kogarah; Peter Bremner, Western Respiratory Trial Specialists, Murdoch, Perth.
- Denmark: Niels Seersholm, Gentofte Hospital, Hellerup; Uffe Bødtger, Næstved Hospital, Næstved; Christian Meyer, Roskilde Sygehus, Roskilde.
- France: Denis Caillaud, CHU de Clermont Ferrand – Hôpital Gabriel Montpied, Clermont-Ferrand; Arnaud Bourdin, CHU Arnaud Villeuneuve, Montpellier; Jacques Dupouy, Cabinet Medical Dupouy, Nîmes; Philippe Sallettaz, Cabinet Médical, Toulon.
- Germany: Tobias Welte, Medizinische Hochschule Hannover, Hannover; Martin Hoffmann, Pneumologikum im Südstadtforum, Hannover; Anneliese Linnhoff, Research Centre for Medical Studies (RCMS), Berlin; Ulrike Westerhausen, Ärztezentrum Axel Springer Passage, Berlin; Petra Mikloweit, Pneumolog. Forschungsinstitut Hohegeest GbR, Geesthacht; Axel Kroker, Pneumologische Schwerpunktpraxis Kroker, Schaeben, Schmidt, Koblenz; Thomas Schultz, MECS Research GmbH, Berlin; Sven Philip Aries, Elbpneumologie, Hamburg; Frank Käßner, MECS GmbH, Cottbus; Claus Kroegel, Universitätsklinikum Jena, Jena; Sabine Ballenberger, Ballenberger, Freytag, Wenisch - Institu f. klin. Forschung , Neu-Isenburg; Claus Keller, Studienzentrum Dr. Keller, Frankfurt/Main.
- Israel: Gershon Fink, Kaplan Medical Center, Rehovot; Zeev Vilayi-Weiler, Barzilai Medical Center, Ashkelon; Raphael Breuer, Hadassah Medical organization, Jerusalem; Michael Segel, The Chaim Sheba Medical Center [Oncology], Tel Hashomer; Tatiana, Boikaner Ha'emek Medical Center, Afula; Mordechai Yigla, Rambam Health Care Campus, Haifa; Adir Yochai, Lady Davis Carmel Hospital, Haifa; Nimrod Maimon, Soroka University Medical Center, Beer-Sheba; Yehuda Schwarz, Tel Aviv Sourasky Medical Center, Tel Aviv; Mordechai Kramer, Rabin Medical Center – Beilinson Hospital, Petah Tikva.

- Italy: Pierluigi Paggiaro, SO di Cisanello, AOU Pisana, Cisanello; Claudio Fracchia, Fondazione Salvatore Maugeri, Istituto Scientifico di Riabil, Montescano; Gianni Balzano, IRCCS Fondazione "Salvatore Maugeri" Istituto Scientifico, Telesse Terme (BN); Antonio Spanevello, Fondazione S. Maugeri, Tradate (Varese); Mauro Carone, Fondazione Salvatore Maugeri, IRCCS, Cassano delle Murge (BA); Caterina Zucca, ASL 8 Cagliari – Ospedale Binaghi, Su Planu Selargius – Cagliari; Marco Confalonieri, Azienda Ospedaliero-Universitaria "Ospedali Riuniti di Tries, Trieste; Salvatore Valente, Università Cattolica del Sacro Cuore – Policlinico Universit, Roma; Giuseppe Di Maria, PO G.Rodolico, AOU Policlinico-Vittorio Emanuele Catania, Catania; Ugo Pradal, Borgo Trento, AOU Integrata di Verona, Verona.
- Japan: Makoto Yoshida, Fukuoka National Hospital, Fukuoka; Yoshikazu Inoue, Kinki-Chuo Chest Medical Center, Sakai; Hideshi Uramoto, Kumamoto Saishunso National Hospital, Koshi; Takefumi Saito, Ibarakihigashi National Hospital, Naka-gun; Hideaki Nagai, Tokyo National Hospital, Kiyose; Osamu Hataji, Matsusaka City Hospital, Matsusaka; Hidenori Ibata, Mie Chuo Medical Center, Tsu; Hiroshi Hayakawa, Tenryu Hospital, Hamamatsu; Masahiro Abe, Ehime Medical Center, Touon; Daisuke Kurai, Kyorin University Hospital, Mitaka.
- Latvia: Aurika Babjoniseva, Pauls Stradins Clinical University Hospital, Riga; Lilita Mitrofanova, Health Centers Association, OLVI Medical Center, Daugavpils; Zinaida Lapkovska, Kraslava Hospital, Kraslava; Iveta Kroica, Latvian University Medical Postgraduate Institute, Riga; Inga Vikmane, Riga East Clinical University Hospital clinic "Gailezers", Riga; Nadezda Kolosa, Daugavpils Regional Hospital, Daugavpil; Aiva Petersone, Petersone A. - Doctors Practice in Pneumonology, Talsi; Ilze Reinholde, Rīgas pilsētas 1. Klīniskā slimnīca, Riga.
- New Zealand: Michael Epton, Canterbury Respiratory Research Group, Christchurch; Dean Quinn, P3 Research, Newtown; Catherina Li-Lin Chang, Waikato Hospital, Hamilton; Andrew Veale, The New Zealand Respiratory and Sleep Institute, Auckland; Stuart Jones, The University of Auckland, Middlemore Hospital, Otahuhu; Paul Noonan, P3 Research, Tauranga; Kyle Perrin, Medical Research Institute of New Zealand, Newtown; Ben Brockway, Dunedin Hospital, Dunedin.
- Slovakia: Maria Drugdova, Pneumo-Alergo centrum s.r.o., Bratislava; Luboslava Frajtova, PULMO, s.r.o., Presov.
- Spain: Eva Polverino, Institut Clínic del Tórax, Barcelona; Luis Lores Obradors, H.G. Parc San. St Joan Deu, Sant Boi de Llobregat; Jordi Dorca Sargatal, H.U. Bellvitge, Hospitalet de Llobregat; Luis Valdés Cuadrado, C.H.U. de Santiago, Santiago de Compostela; David Ramos Barbón, H. Sta. Creu i St. Pau, Barcelona; Rosa María Girón Moreno, H.U.

La Princesa, Madrid; Ignasi García Olivé, H.U. G. Trias i Pujol, Badalona; Jose Echave-Sustaeta, H. Quiron Madrid, Pozuelo de Alarcon; Marta García Clemente, H.U.C. de Asturias, Oviedo; Eleuterio Llorca Martínez, H. General de Elda, Elda; Rubén Lera Álvarez, H.U. Dr. Peset, Valencia; Rosario Menéndez Villanueva, H.U.P. La Fe, Valencia; María Asunción Nieto Barbero, H.C. S.Carlos, Madrid.

- United Kingdom: Anthony De Soyza, Freeman Hospital, Newcastle; Nicholas Withers, Royal Devon and Exeter Hospital, Exeter; Damien Downey, Belfast City Hospital, Belfast; David Derry, Derriford Hospital, Plymouth; Lee Dobson, Torbay Hospital, Torquay; Michael Loebinger, Royal Brompton and Harefield NHS Foundation Trust, London; Charles Haworth, Papworth Hospital, Cambridge; Martin Kelly, Western Health and Social Care Trust, Londonderry; Alexander Moorcroft, Royal Shrewsbury Hospital, Shrewsbury; James Chalmers, Ninewells Hospital and Medical School, Dundee.
- United State of America: Andrew Wachtel, Southern California Institute for Respiratory Diseases, Inc., Los Angeles; Paul Weinberg, Gwinnett Biomedical Research, Lawrenceville; Faisal Fakhri, Florida Pulmonary Research Institute, LLC, Winter Park; Ritsu Kuno, Pulmonary Associates of Richmond Inc – Boulders Office Park, Richmond; Stephen Ryan, MultiCare Pulmonary Specialists, Tacoma; Neil Ettinger, Cardio-Pulmonary Associates at Saint Luke's Hospital, Chesterfield; Maurice Ndukwe Ikeadi, LaPorte County Institute for Clinical Research, Michigan City; Mark Gotfried, Pulmonary Associates, PA, Phoenix; Firas Koura, Hazard ARH Regional Medical Center, Hazard; Matthias Salathe, University of Miami UHealth Pulmonology at the Rosenstiel Bu, Miami; Christopher Landon, Ventura County Medical Center, Ventura; Varsha Taskar, The University of Texas Health Science Center at Tyler, Tyler; Stuart Garay, New York Pulmonary Associates, New York; Emory Robinette, Pulmonary Research of Abingdon, Abingdon; David Hill, Waterbury Pulmonary Associates, Waterbury; Robert Sussman, Pulmonary and Allergy Associates, P.A., Summit; Douglas Mapel, Clinical Trial Connection, Flagstaff; Shahrukh Kureishy, Metroplex Pulmonary and Sleep Center, McKinney; Arturo Meade, Sparks Regional Medical Center, Fort Smith; Anne O'Donnell, Georgetown University Medical Center (GUMC), Washington; Janice Wang Long Island Jewish Medical Center, New Hyde Park; Patrick Flume, Medical University of South Carolina, Charleston; Kevin DeBoer, Central Florida Pulmonary Group, PA, Orlando; Gnananandh Jayaraman, Kingwood Research Institute, Kingwood; Alan Barker, Oregon Health and Science University, Portland; Daria Lee, Sleep and Fatigue Associates, PA, Houston; Fred Umeh, Florida Lung, Asthma, & Sleep Specialists, Celebration, John Burk, Texas Pulmonary And Critical Care, Fort Worth.

**TABLE S1** Randomisation by country

| <b>Country</b>        | <b>Total<br/>N=416</b> |
|-----------------------|------------------------|
| <b>Israel</b>         | 53 (12.7)              |
| <b>Australia</b>      | 52 (12.5)              |
| <b>New Zealand</b>    | 51 (12.3)              |
| <b>Spain</b>          | 49 (11.8)              |
| <b>Germany</b>        | 47 (11.3)              |
| <b>United States</b>  | 44 (10.6)              |
| <b>Japan</b>          | 33 (7.9)               |
| <b>United Kingdom</b> | 27 (6.5)               |
| <b>Italy</b>          | 21 (5.0)               |
| <b>Latvia</b>         | 16 (3.8)               |
| <b>France</b>         | 14 (3.4)               |
| <b>Argentina</b>      | 6 (1.4)                |
| <b>Slovakia</b>       | 2 (0.5)                |
| <b>Denmark</b>        | 1 (0.2)                |

Data are presented as n (%).

**TABLE S2** Pre-specified pathogens isolated at baseline

| Species               | Ciprofloxacin<br>DPI 14-days<br>on/off<br>n=137 | Placebo<br>14-days on/off<br>n=68 | Ciprofloxacin<br>DPI 28-days<br>on/off<br>n=141 | Placebo<br>28-days on/off<br>n=70 | Pooled placebo<br>n=138 | Total<br>N=416 |
|-----------------------|-------------------------------------------------|-----------------------------------|-------------------------------------------------|-----------------------------------|-------------------------|----------------|
| <i>P. aeruginosa</i>  | 83 (60.6)                                       | 41 (60.3)                         | 83 (58.9)                                       | 45 (64.3)                         | 86 (62.3)               | 252 (60.6)     |
| <i>H. influenzae</i>  | 34 (24.8)                                       | 21 (30.9)                         | 34 (24.1)                                       | 21 (30.0)                         | 42 (30.4)               | 110 (26.4)     |
| <i>S. aureus</i>      | 26 (19.0)                                       | 12 (17.6)                         | 34 (24.1)                                       | 17 (24.3)                         | 29 (21.0)               | 89 (21.4)      |
| <i>S. pneumoniae</i>  | 11 (8.0)                                        | 8 (11.8)                          | 11 (7.8)                                        | 4 (5.7)                           | 12 (8.7)                | 34 (8.2)       |
| <i>M. catarrhalis</i> | 7 (5.1)                                         | 3 (4.4)                           | 9 (6.4)                                         | 6 (8.6)                           | 9 (6.5)                 | 25 (6.0)       |
| <i>S. maltophilia</i> | 9 (6.6)                                         | 0 (0)                             | 2 (1.4)                                         | 0 (0)                             | 0 (0)                   | 11 (2.6)       |
| <i>B. cepacia</i>     | 0                                               | 0                                 | 0                                               | 0                                 | 0                       | 0              |

Data are presented as n (%). Pathogens were isolated at screening, and/or Day 1. Patients could have more than one pathogen. DPI: dry powder for inhalation.

**TABLE S3** Concomitant respiratory medications at baseline

|                                          | <b>Ciprofloxacin<br/>DPI<br/>14-days on/off</b> | <b>Placebo<br/>14-days on/off</b> | <b>Ciprofloxacin<br/>DPI<br/>28-days on/off</b> | <b>Placebo<br/>28-days on/off</b> |
|------------------------------------------|-------------------------------------------------|-----------------------------------|-------------------------------------------------|-----------------------------------|
|                                          | <b>n=137</b>                                    | <b>n=68</b>                       | <b>n=141</b>                                    | <b>n=70</b>                       |
| <b>Any respiratory medication</b>        | 113 (82.5)                                      | 52 (76.5)                         | 114 (80.9)                                      | 56 (80.0)                         |
| <b>Mucolytics</b>                        | 27 (19.7)                                       | 13 (19.1)                         | 26 (18.4)                                       | 10 (14.3)                         |
| <b>Bronchodilators<sup>#</sup></b>       | 89 (65.0)                                       | 41 (60.3)                         | 84 (59.6)                                       | 39 (55.7)                         |
| <b>Inhaled corticosteroids</b>           | 53 (38.7)                                       | 21 (30.9)                         | 54 (38.3)                                       | 25 (35.7)                         |
| <b>Low-dose systemic corticosteroids</b> | 4 (2.9)                                         | 0                                 | 6 (4.3)                                         | 1 (1.4)                           |
| <b>Long-term oral macrolides</b>         | 24 (17.5)                                       | 8 (11.8)                          | 22 (15.6)                                       | 12 (17.1)                         |
| <b>Theophylline</b>                      | 5 (3.6)                                         | 1 (1.5)                           | 3 (2.1)                                         | 0                                 |
| <b>Other respiratory medication</b>      | 0                                               | 0                                 | 2 (1.4)                                         | 2 (2.9)                           |

Note: patients could be treated with more than one therapy at screening/baseline. Data are presented as n (%). #: bronchodilators include: long acting  $\beta$ -agonist bronchodilators, short acting  $\beta$ -agonist bronchodilators, long-acting anticholinergic bronchodilators and short-acting anticholinergic bronchodilators. DPI; dry powder for inhalation.



**TABLE S4** Serious treatment-emergent (TE) adverse events (AEs) and deaths

| Preferred MedDRA term                                                           | Ciprofloxacin DPI                    |                         | Pooled placebo<br>n=137 <sup>#</sup> |
|---------------------------------------------------------------------------------|--------------------------------------|-------------------------|--------------------------------------|
|                                                                                 | 14-days on/off<br>n=136 <sup>#</sup> | 28-days on/off<br>n=141 |                                      |
| <b>Any serious TE adverse event</b>                                             | 23 (16.9)                            | 28 (19.9)               | 32 (23.4)                            |
| <b>Respiratory, thoracic, and mediastinal disorders</b>                         | 10 (7.4)                             | 19 (13.5)               | 18 (13.1)                            |
| Bronchiectasis exacerbations                                                    | 8 (5.9)                              | 16 (11.3)               | 17 (12.4)                            |
| Haemoptysis                                                                     | 1 (0.7)                              | 2 (1.4)                 | 2 (1.5)                              |
| <b>Infections and infestations</b>                                              | 5 (3.7)                              | 9 (6.4)                 | 9 (6.6)                              |
| Infective exacerbation of bronchiectasis                                        | 1 (0.7)                              | 2 (1.4)                 | 1 (0.7)                              |
| Pneumonia                                                                       | 4 (2.9)                              | 4 (2.8)                 | 5 (3.6)                              |
| <b>Cardiac disorders</b>                                                        | 3 (2.2)                              | 2 (1.4)                 | 3 (2.2)                              |
| Cardiac failure                                                                 | 1 (0.7)                              | 0                       | 2 (1.5)                              |
| <b>Injury, poisoning and procedural complications</b>                           | 4 (2.9)                              | 1 (0.7)                 | 2 (1.5)                              |
| <b>Neoplasms benign, malignant and unspecified (including cysts and polyps)</b> | 1 (0.7)                              | 1 (0.7)                 | 4 (2.9)                              |
| <b>Nervous system disorders</b>                                                 | 1 (0.7)                              | 1 (0.7)                 | 3 (2.2)                              |
| <b>Renal and urinary disorders</b>                                              | 2 (1.5)                              | 0                       | 2 (1.5)                              |
| <b>Vascular disorders</b>                                                       | 2 (1.5)                              | 0                       | 1 (0.7)                              |
| <b>General disorders and administration site conditions</b>                     | 2 (1.5)                              | 1 (0.7)                 | 0                                    |
| <b>Eye disorders</b>                                                            | 1 (0.7)                              | 1 (0.7)                 | 0                                    |
| <b>Gastrointestinal disorders</b>                                               | 0                                    | 0                       | 2 (1.5)                              |
| <b>Musculoskeletal and connective tissue disorders</b>                          | 0                                    | 1 (0.7)                 | 1 (0.7)                              |
| <b>Blood and lymphatic system disorders</b>                                     | 0                                    | 0                       | 1 (0.7)                              |

|                                                 |         |         |         |
|-------------------------------------------------|---------|---------|---------|
| <b>Hepatobiliary disorders</b>                  | 0       | 0       | 1 (0.7) |
| <b>Immune system disorders</b>                  | 0       | 1 (0.7) | 0       |
| <b>Investigations</b>                           | 0       | 1 (0.7) | 0       |
| <b>Metabolism and nutrition disorders</b>       | 1 (0.7) | 0       | 0       |
| <b>Reproductive system and breast disorders</b> | 1 (0.7) | 0       | 0       |
| <b>Any TE-AE with outcome death</b>             | 1 (0.7) | 2 (1.4) | 3 (2.2) |
| Pneumonia                                       | 0       | 1 (0.7) | 1 (0.7) |
| Aspiration pneumonia                            | 1 (0.7) | 0       | 0       |
| Cor pulmonale                                   | 0       | 1 (0.7) | 0       |
| Pulmonary haemorrhage                           | 0       | 0       | 1 (0.7) |
| Complications of transplant surgery             | 0       | 0       | 1 (0.7) |

---

#: two randomised subjects did not receive study medication (one in Ciprofloxacin DPI 14-days on/off and one in placebo 28-days on/off). Data are presented as n (%). Serious TE adverse events are listed by MedDRA system organ class and by preferred term if more than one subject in any treatment group was affected. Subjects could experience more than one serious TE adverse event. DPI: dry powder for inhalation; MedDRA: Medical Dictionary for Regulatory Activities.

**FIGURE S1** Ciprofloxacin DPI pocket-sized inhaler.

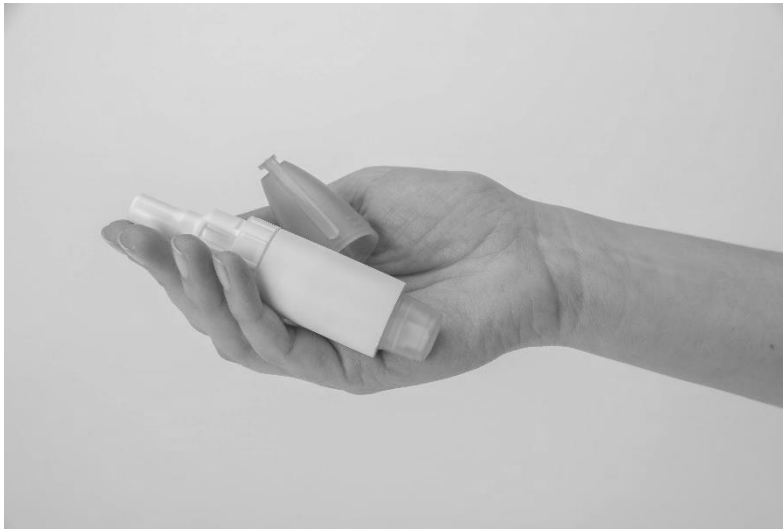

**FIGURE S2** End-points according to hierarchical analysis plan.

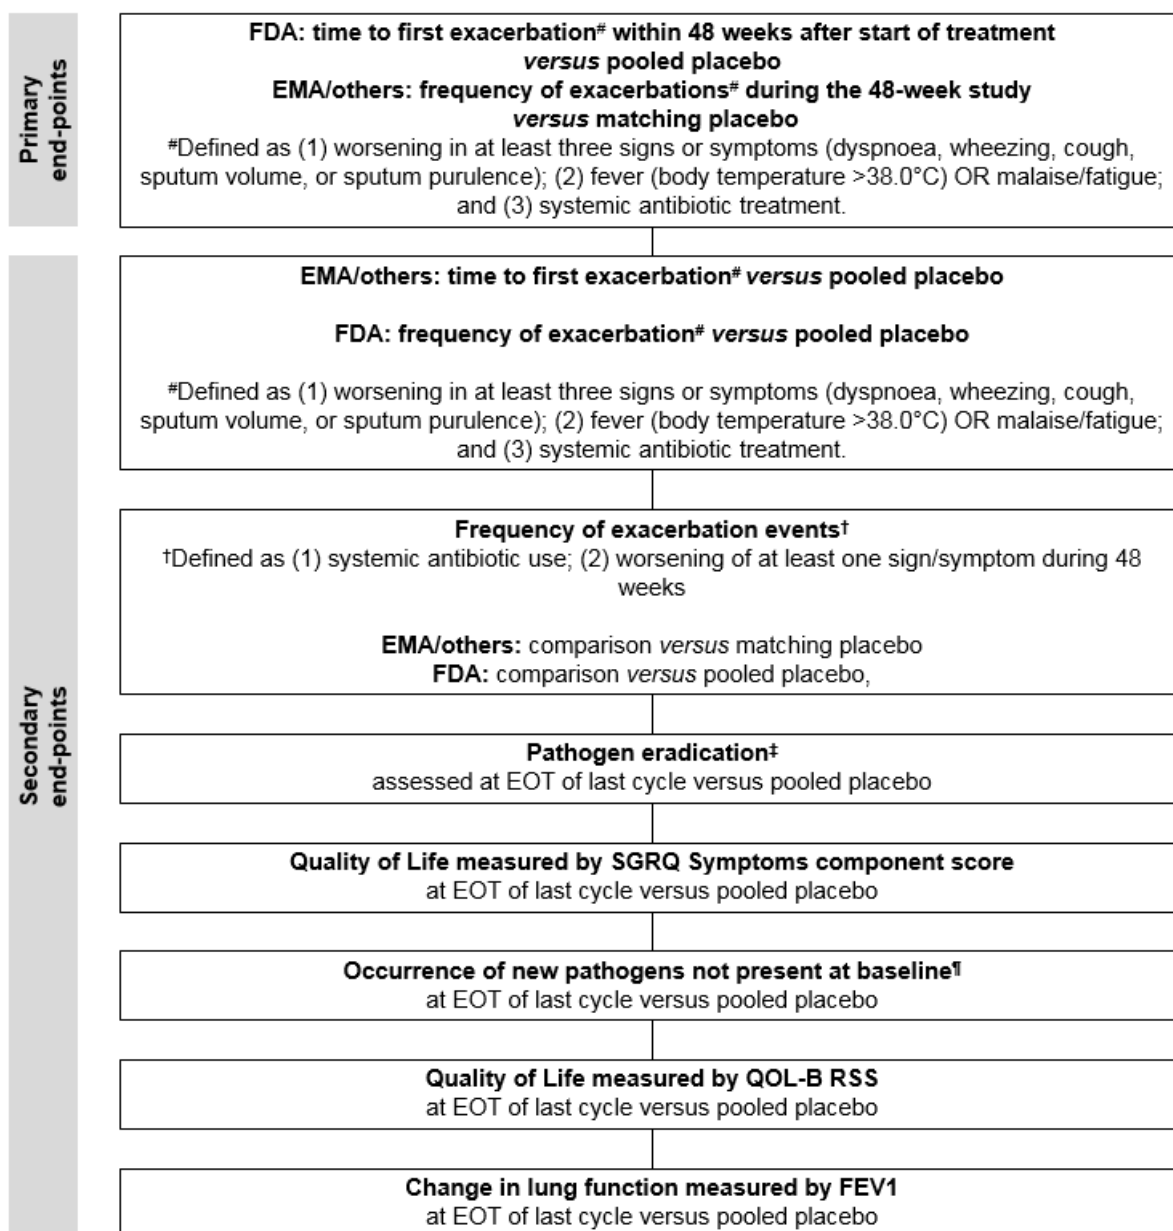

EMA: European Medicines Agency; EOT: end of treatment; FDA: Food and Drug Administration; FEV1: forced expiratory volume in 1 second; QOL-B RSS: Quality of Life-Bronchiectasis Respiratory Symptom Score; SGRQ: St. George's Respiratory Questionnaire; <sup>‡</sup>Compared against baseline i.e. using all sputum samples collected at the screening and/or at the randomisation visit prior to first study drug inhalation. End of treatment is not EOT visit, but individual last treatment of last cycle Week 44/46. <sup>¶</sup>Compared against baseline i.e. using all sputum samples collected at the screening and/or at the randomisation visit prior to first study drug inhalation.

**FIGURE S3** Efficacy of Ciprofloxacin DPI in pre-specified subgroups: a) Ciprofloxacin DPI 14-days on/off; b) Ciprofloxacin DPI 28-days on/off *versus* pooled (time to first exacerbation) or matching placebo (frequency of exacerbation).

a)

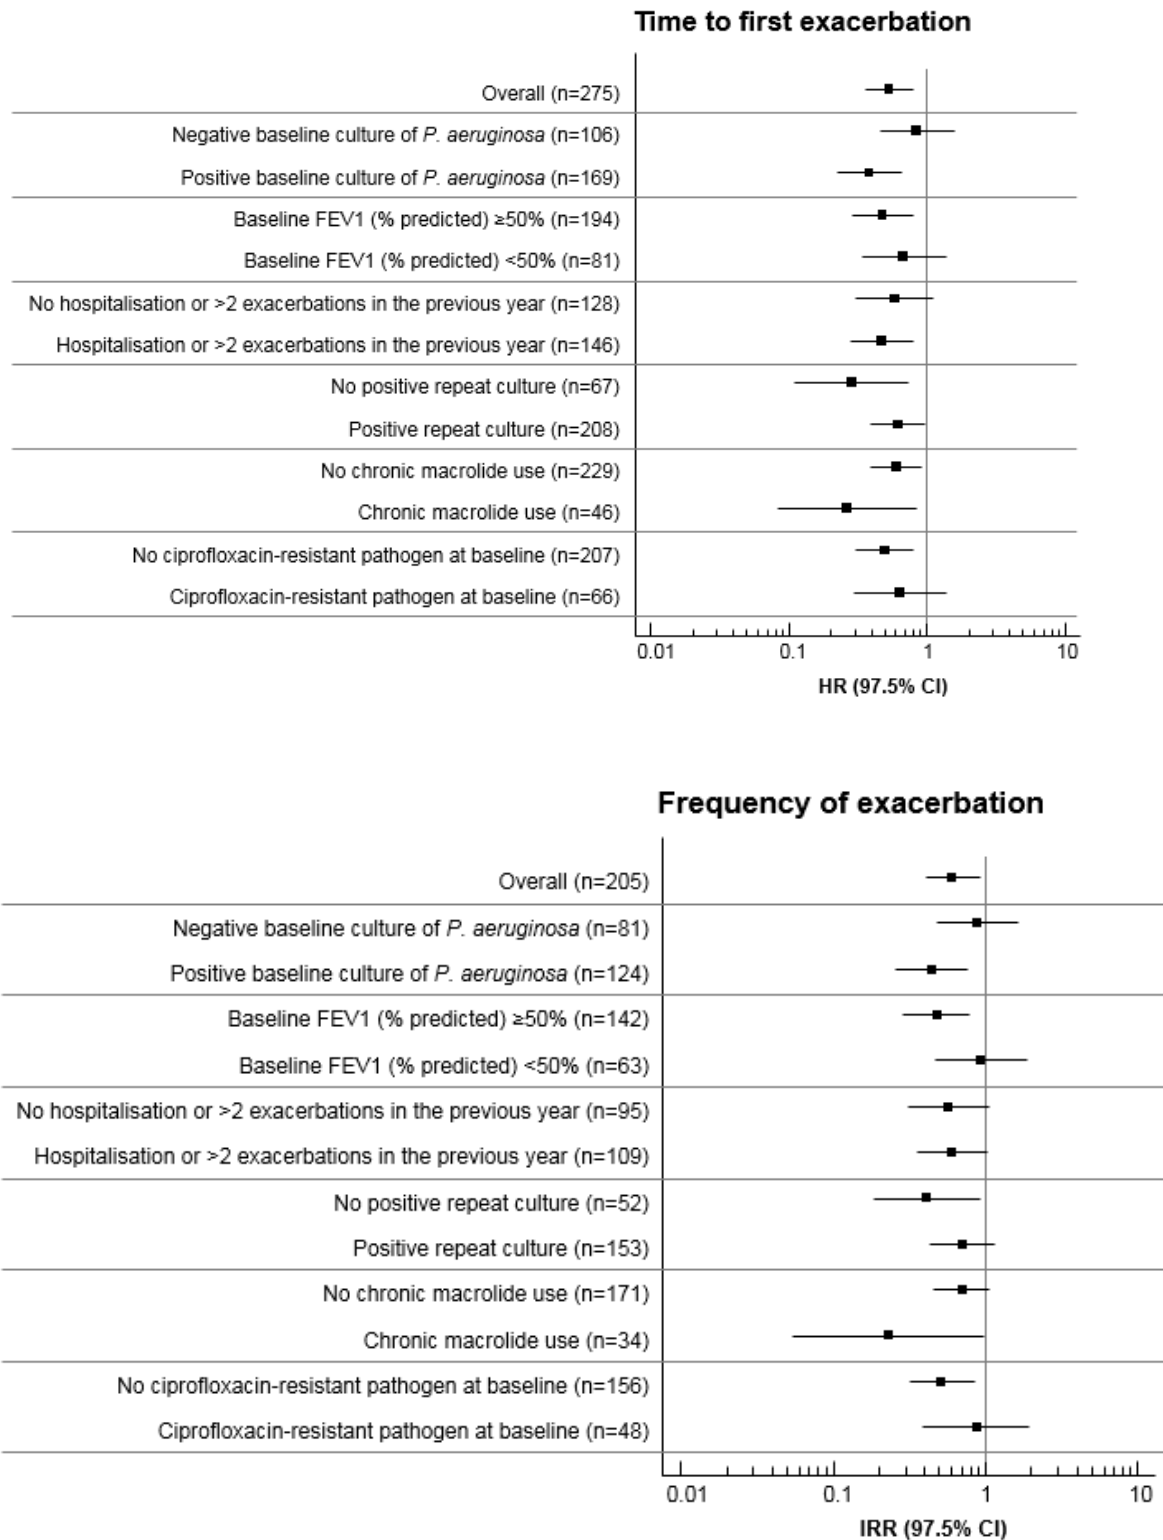

b)

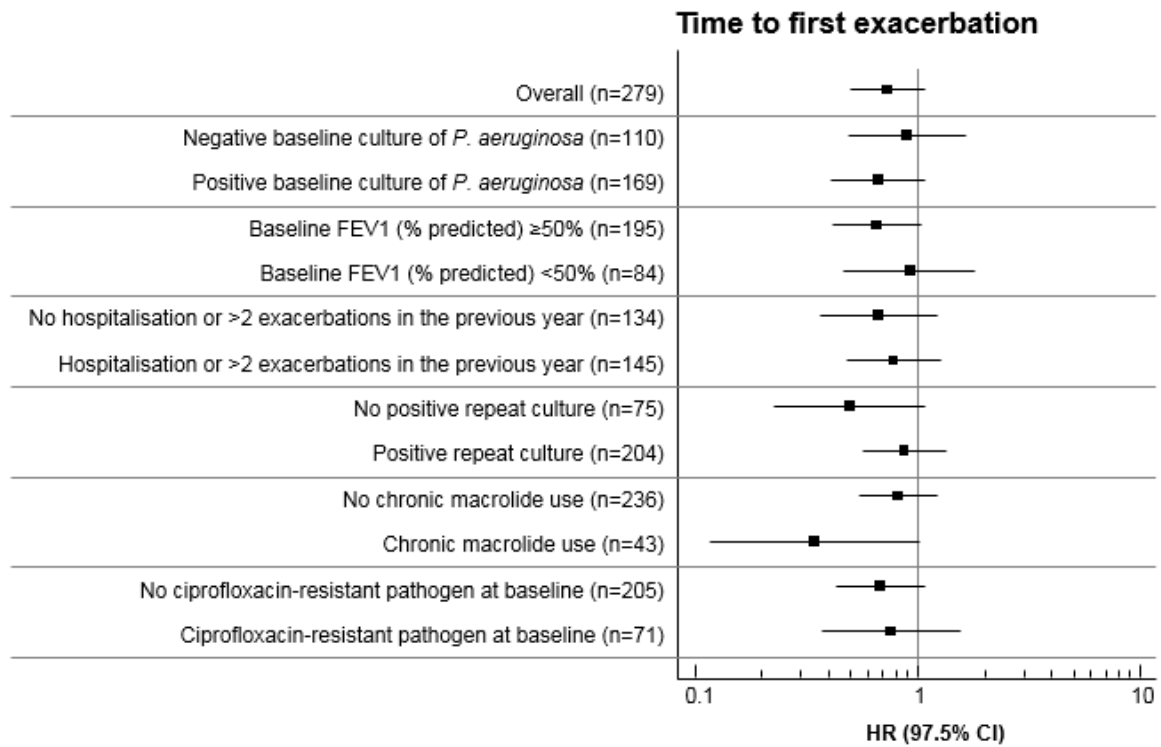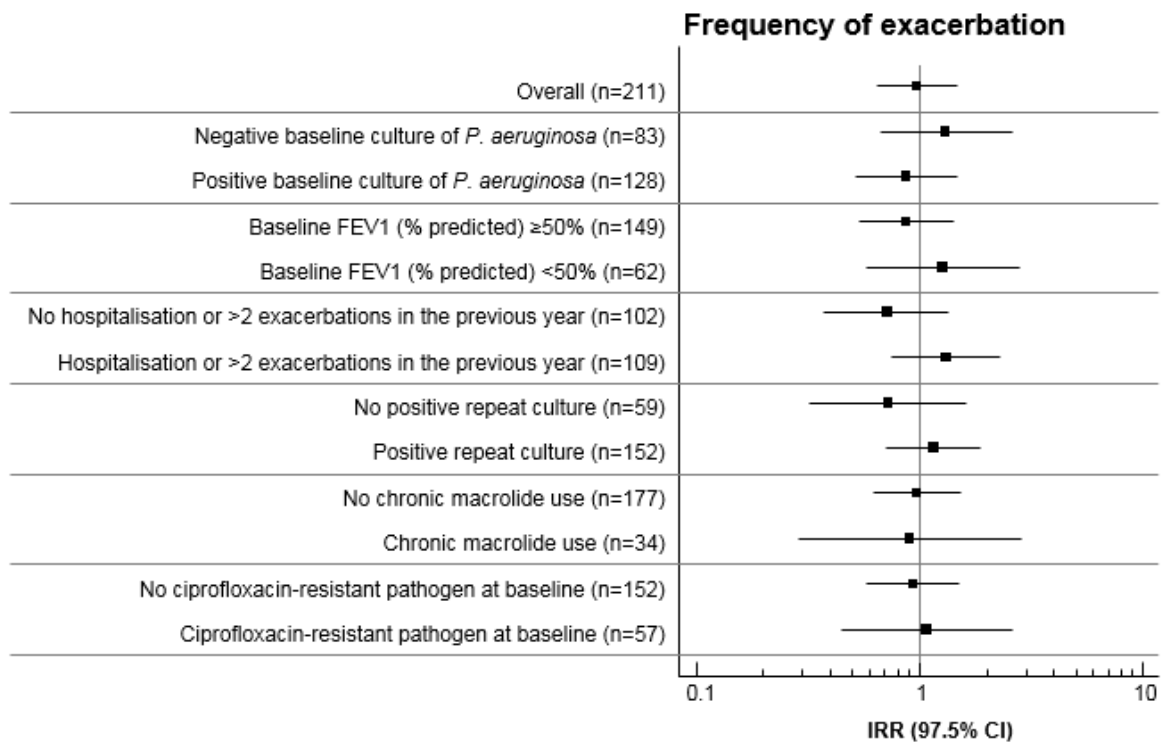

n=total number of patients (active therapy and pooled placebo or active and matching placebo). CI: confidence interval; FEV1: forced expiratory volume in 1 second; HR: hazard ratio; IRR: incidence rate ratio.
